# Supplementary material for: Application of chemically synthesized polypyrrole with hydro-sponge characteristic as electrode in water desalination
Source: Royal Society of Chemistry journal article supplement (doi:10.1039/c5ra09062h), 2015-01-01
Supplement: c5ra09062h1.pdf [file c5ra09062h1.pdf]

## Application of chemically synthesized polypyrrole with hydro-sponge characteristic as electrode in water desalination

Jiangtao Feng<sup>a</sup>, Qian Zhang<sup>a</sup>, Jiajing Wang<sup>a</sup>, Honghui Yang, Hao Xu<sup>a\*</sup>, Wei Yan<sup>a,b\*</sup>

*a. Department of Environmental Science and Engineering, Xi'an Jiaotong University, Xi'an 710049, China*

*b. The State Key Laboratory of Multiphase Flow in Power Engineering, Xi'an Jiaotong University, Xi'an, 710049,  
China*

<sup>a\*</sup> Corresponding author

Email address: [Xuhao@mail.xjtu.edu.cn](mailto:Xuhao@mail.xjtu.edu.cn) (H Xu)

<sup>a,b\*</sup> Corresponding author

Tel: +86 029 82664731

Email address: [yanwei@mail.xjtu.edu.cn](mailto:yanwei@mail.xjtu.edu.cn) (W Yan)

Table S1 Expansion ratio of PPy/A<sup>-</sup> for 10 sopping up/dehydrate cycles

| Time<br>s | Py/pTS <sup>-</sup> (molar ratio) |      |          |          |          | Py/BS <sup>-</sup> (molar ratio) |      |      |      |      | Py/NO <sub>3</sub> <sup>-</sup> (molar ratio) |      |      |      |      |
|-----------|-----------------------------------|------|----------|----------|----------|----------------------------------|------|------|------|------|-----------------------------------------------|------|------|------|------|
|           | 3:1                               | 2:3  | 1:1      | 1:2      | 1:3      | 3:1                              | 2:3  | 1:1  | 1:2  | 1:3  | 3:1                                           | 2:3  | 1:1  | 1:2  | 1:3  |
| 1         | 1.1<br>0                          | 1.11 | 1.1<br>1 | 1.1<br>6 | 1.2<br>0 | 1.20                             | 1.04 | 1.13 | 1.12 | 1.29 | 1.13                                          | 1.09 | 1.18 | 1.28 | 1.29 |
| 2         | 1.1<br>2                          | 1.12 | 1.1<br>3 | 1.1<br>6 | 1.1<br>4 | 1.20                             | 1.07 | 1.05 | 1.09 | 1.18 | 1.16                                          | 1.06 | 1.05 | 1.20 | 1.38 |
| 3         | 1.1<br>2                          | 1.09 | 1.0<br>9 | 1.1<br>6 | 1.1<br>4 | 1.20                             | 1.07 | 1.08 | 1.09 | 1.18 | 1.16                                          | 1.09 | 1.12 | 1.20 | 1.25 |
| 4         | 1.1<br>0                          | 1.06 | 1.1<br>2 | 1.1<br>3 | 1.1<br>8 | 1.17                             | 1.07 | 1.08 | 1.09 | 1.18 | 1.13                                          | 1.12 | 1.19 | 1.20 | 1.21 |
| 5         | 1.1<br>0                          | 1.06 | 1.1<br>2 | 1.1<br>3 | 1.1<br>5 | 1.17                             | 1.05 | 1.08 | 1.09 | 1.18 | 1.13                                          | 1.12 | 1.20 | 1.20 | 1.26 |
| 6         | 1.1<br>0                          | 1.06 | 1.1<br>0 | 1.1<br>7 | 1.1<br>5 | 1.17                             | 1.05 | 1.11 | 1.09 | 1.18 | 1.13                                          | 1.12 | 1.23 | 1.20 | 1.21 |
| 7         | 1.1<br>0                          | 1.03 | 1.1<br>0 | 1.1<br>7 | 1.1<br>2 | 1.13                             | 1.05 | 1.13 | 1.09 | 1.18 | 1.13                                          | 1.09 | 1.23 | 1.20 | 1.18 |
| 8         | 1.1<br>0                          | 1.03 | 1.0<br>8 | 1.1<br>3 | 1.1<br>2 | 1.13                             | 1.05 | 1.13 | 1.09 | 1.18 | 1.10                                          | 1.09 | 1.16 | 1.21 | 1.22 |
| 9         | 1.1<br>0                          | 1.03 | 1.1<br>0 | 1.1<br>3 | 1.1<br>3 | 1.13                             | 1.05 | 1.11 | 1.09 | 1.18 | 1.10                                          | 1.13 | 1.13 | 1.21 | 1.23 |
| 10        | 1.1<br>0                          | 1.03 | 1.0<br>8 | 1.1<br>3 | 1.1<br>5 | 1.13                             | 1.07 | 1.14 | 1.09 | 1.19 | 1.10                                          | 1.13 | 1.13 | 1.21 | 1.23 |

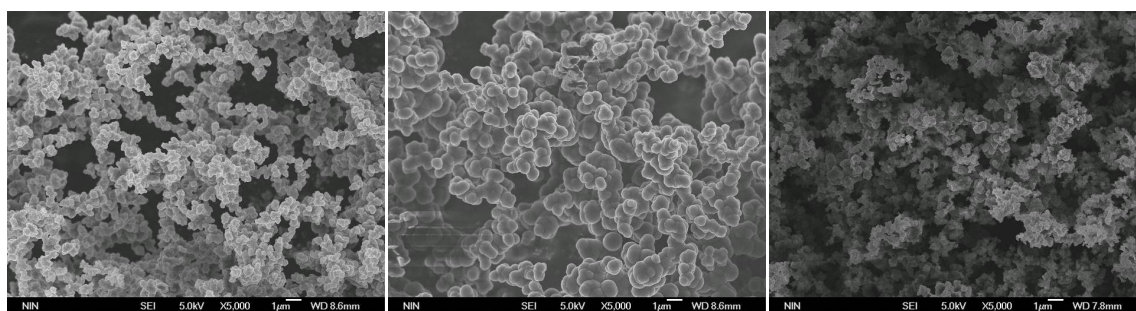

(a)

(b)

(c)

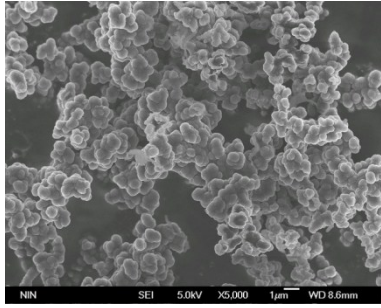

(d)

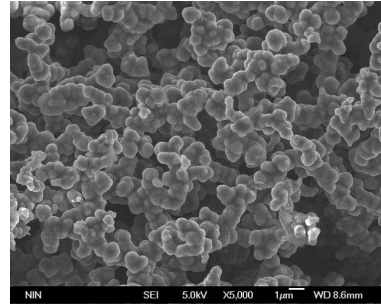

(e)

Fig S1 SEM images of PPy/pTS<sup>-</sup> with different mole ratio of Pyrrole and pTS<sup>-</sup>: (a) 3:1; (b) 2:1; (c) 1:1; (d) 1:2; (e) 1:3

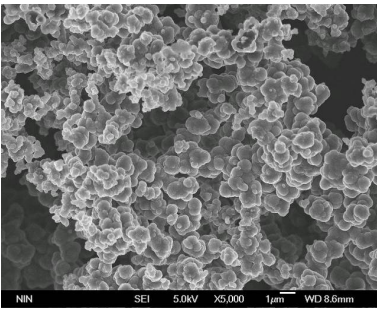

(a)

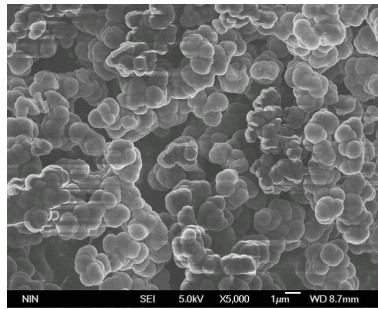

(b)

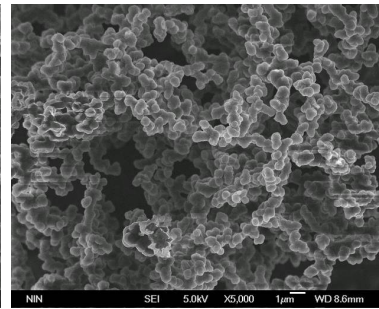

(c)

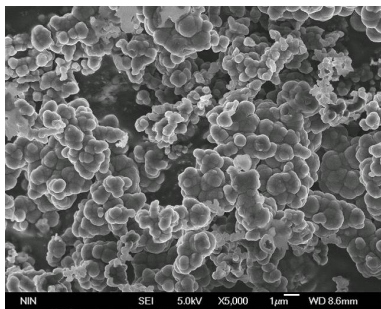

(d)

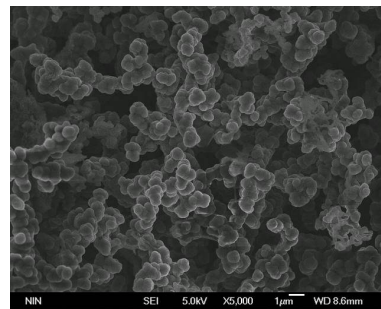

(e)

Fig S2 SEM images of PPy/pTS<sup>-</sup> with different mole ratio of Pyrrole and BS<sup>-</sup>: (a) 3:1; (b) 2:1; (c) 1:1; (d) 1:2; (e) 1:3

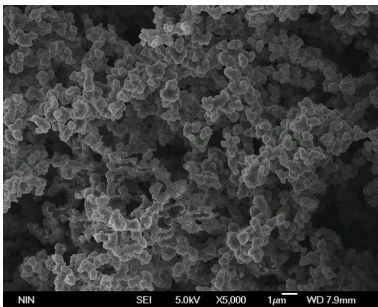

(a)

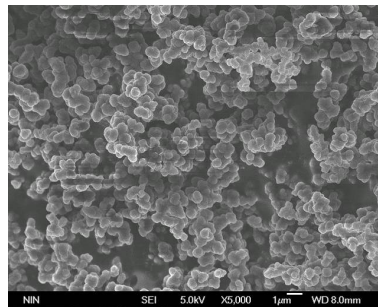

(b)

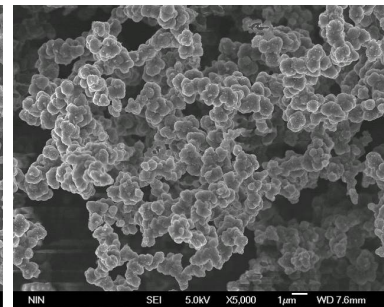

(c)

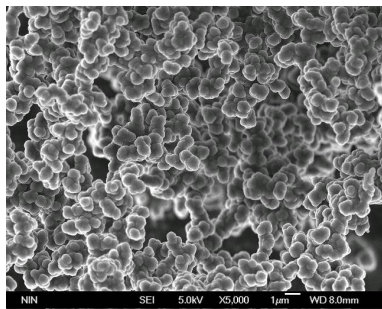

(d)

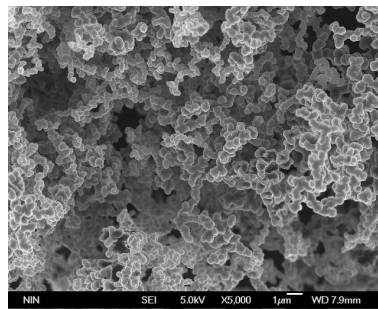

(e)

Fig S3 SEM images of PPy/pTS<sup>-</sup> with different mole ratio of Pyrrole and NO<sub>3</sub><sup>-</sup>: (a) 3:1; (b) 2:1; (c) 1:1; (d) 1:2; (e) 1:3

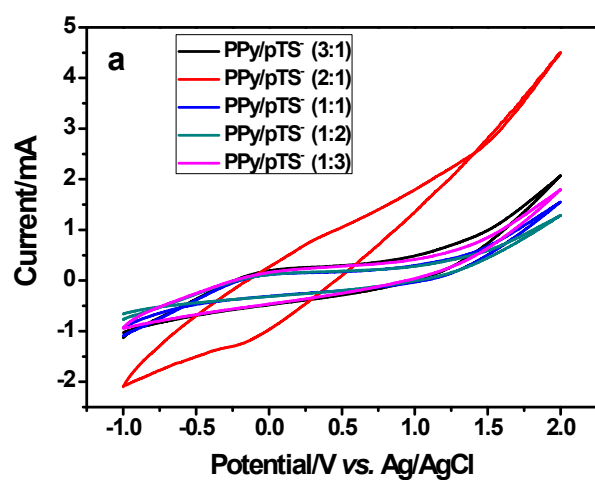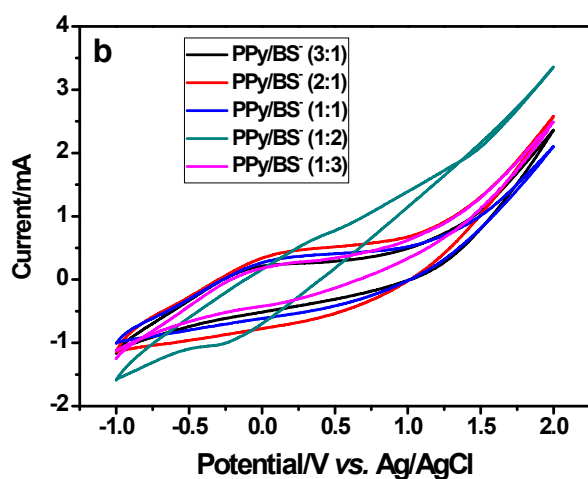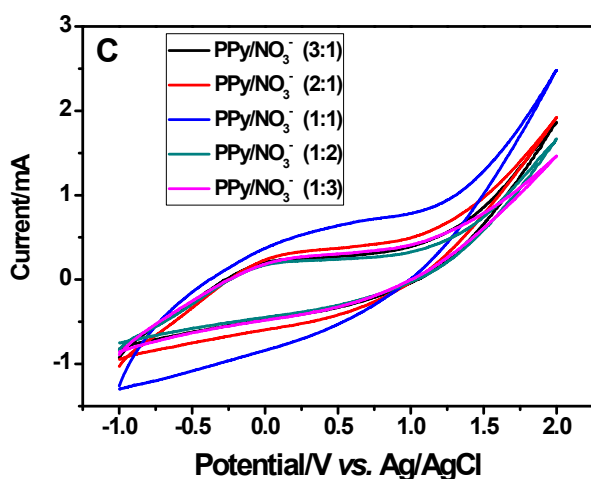

Fig.S4 Cyclic voltammograms of the PPy/A<sup>-</sup> with different doping ratios; other operation conditions: concentration of Na<sup>+</sup> is 1000 mg·L<sup>-1</sup>; voltage is 2.0 V; adsorption time is 3.0 h
